# Supplementary material for: From the dissolution to the extraction of carbohydrates using ionic liquids
Source: Royal Society of Chemistry journal article supplement (doi:10.1039/c3ra42640h), 2013-01-01
Supplement: c3ra42640h.pdf [file c3ra42640h.pdf]

## SUPPORTING INFORMATION

### From the dissolution to the extraction of carbohydrates using ionic liquids

El-Sayed R. E. HASSAN, Fabrice MUTELET and Jean-Charles MOÏSE  
*Université de Lorraine, Ecole Nationale Supérieure des Industries Chimiques, Laboratoire Réactions et Génie des Procédés (UMR CNRS 7274), 1 rue Grandville, 54000 Nancy, France*

Figure S1: The effect of EtOH / IL ratio by weight on the solubility of (a) fructose and (b) lactose in the mixture at temperature = 298 K, time = 300 min and neglected water content

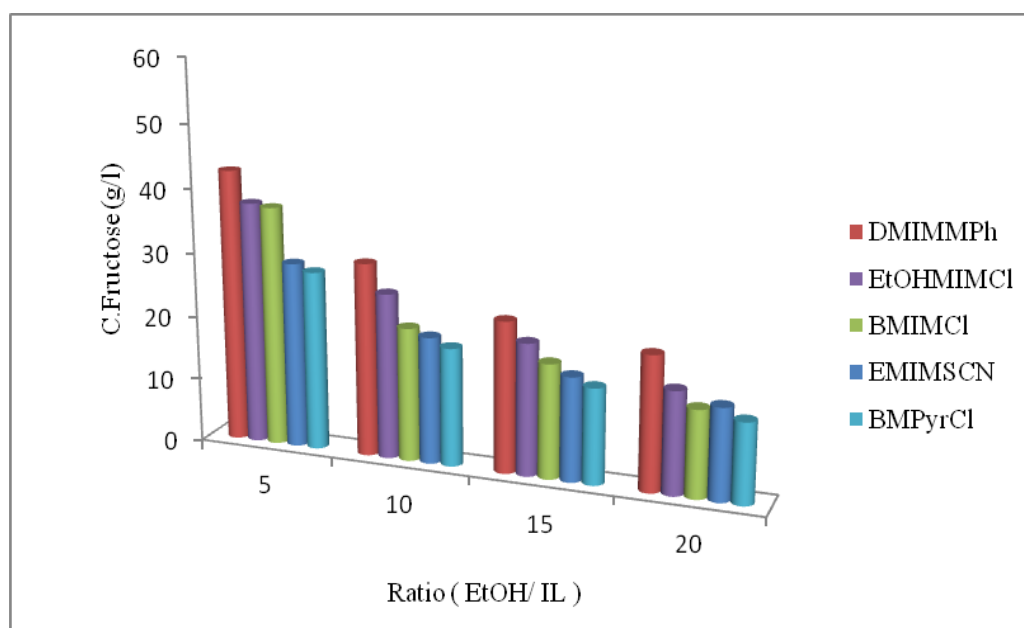

(a)

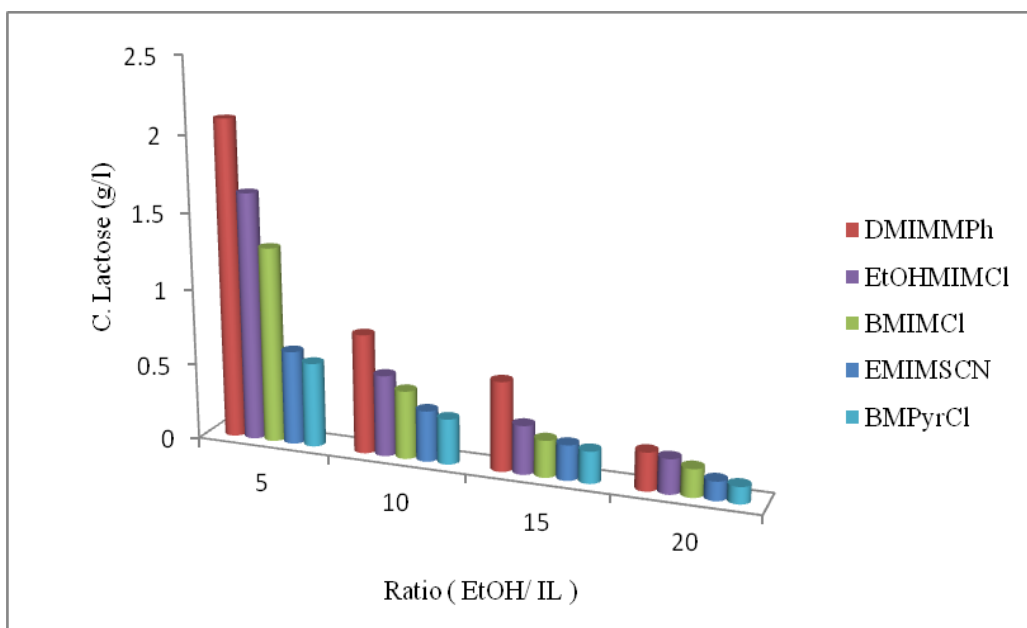

(b)

Figure S2: The effect of temperature (K) on the solubility of (a) fructose and (b) sucrose in the mixture at EtOH/IL ratio by weight =10, time =300 min and neglected water content

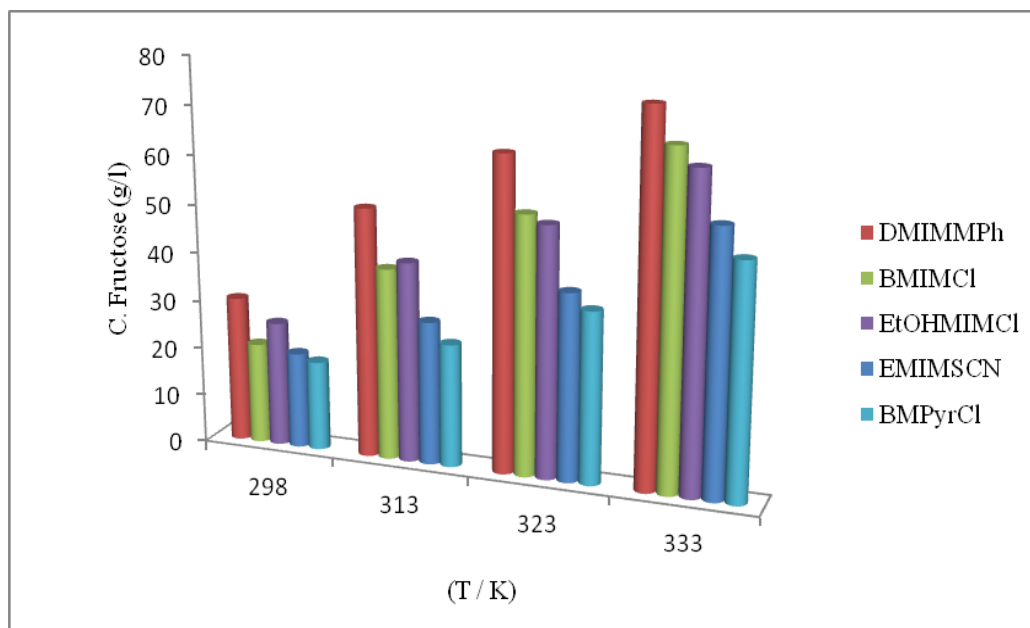

(a)

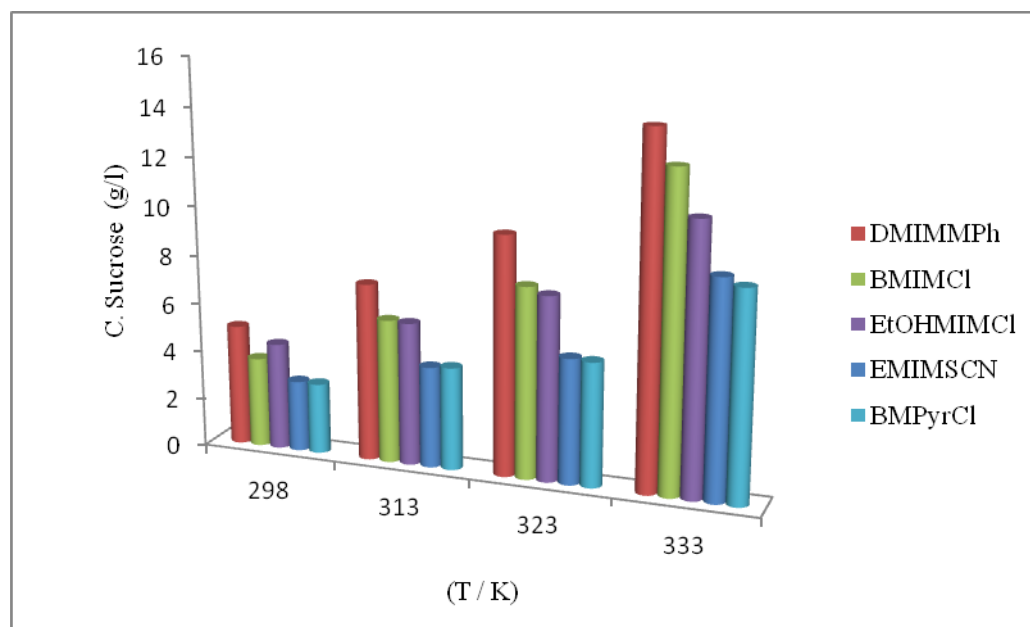

(b)

Figure S3: The effect of water content (%) on the solubility of (a) sucrose and (b) lactose in the mixture at EtOH/IL ratio by weight =10, time =300 min and temperature =298 K

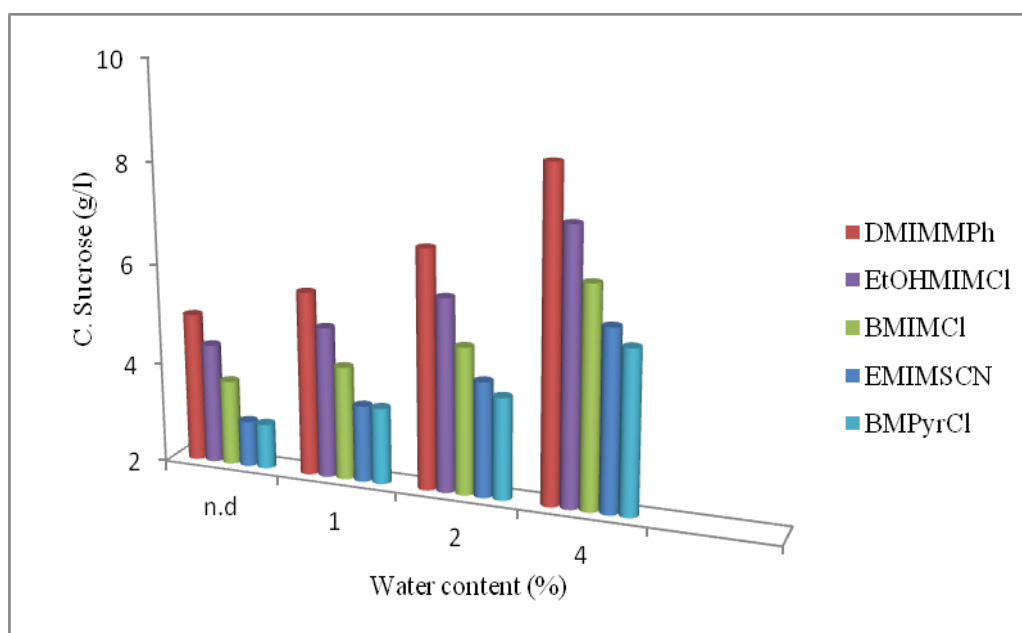

(a)

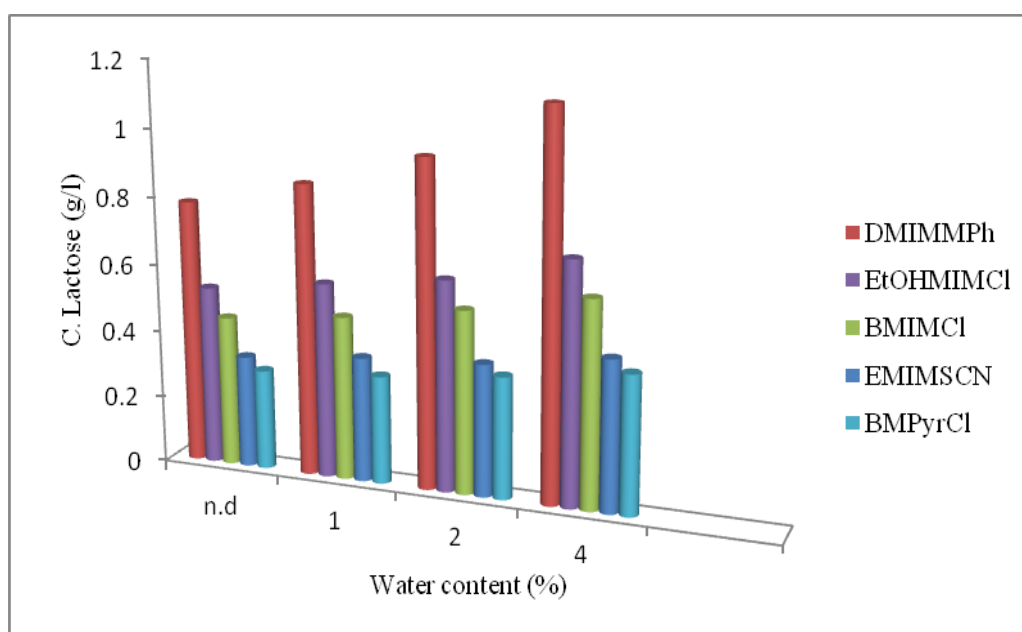

(b)

Figure S4: Dissolution rate of (a) sucrose and (b) lactose in a mixture of (BMIMCl + EtOH) at EtOH/IL ratio by weight =10, neglected water content and temperature = ♦ 298, ■ 313, ▲ 323, and × 333 K

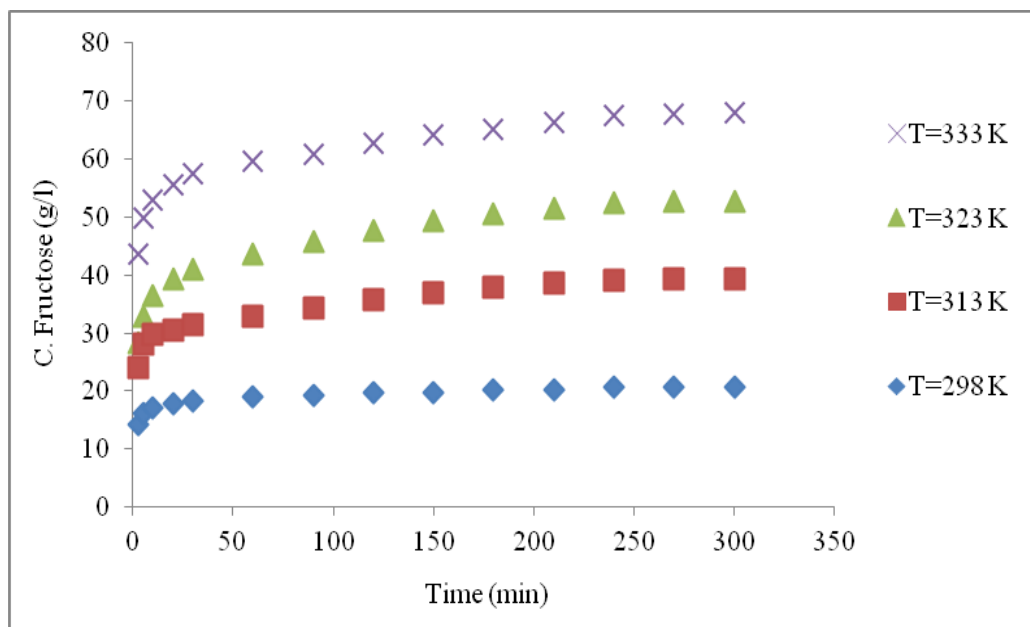

(a)

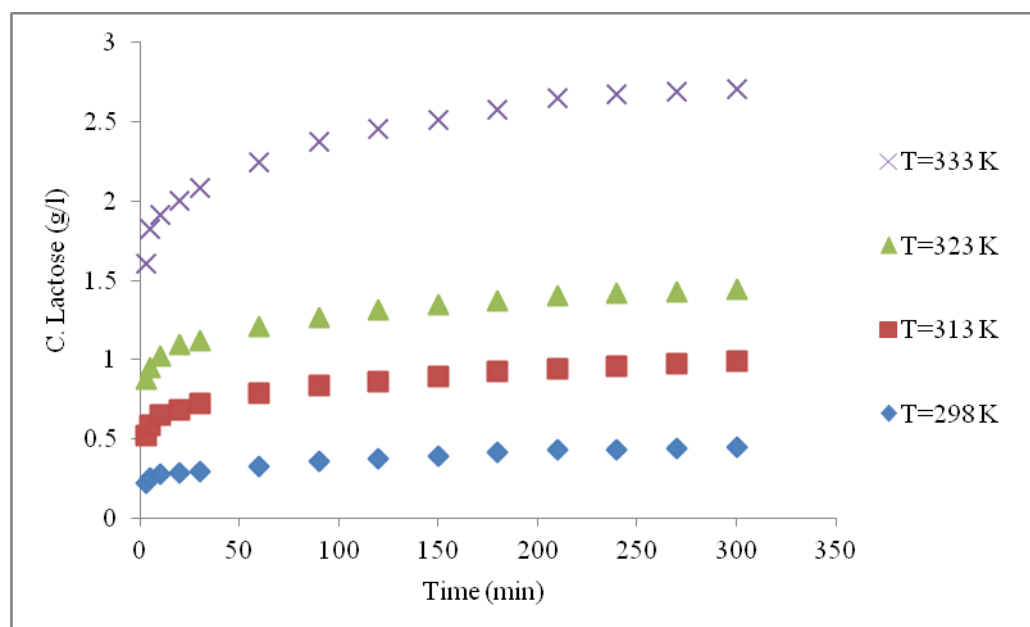

(b)

Table S1: Solid-Liquid equilibria (SLE) of the binary system (Sugar+IL), where  $X_2$  is the sugar mass fraction,  $T_2$  is the temperature (K),  $\gamma_2$  is the activity coefficient calculated with NRTL equation

| Fructose |        |            |         |              |            |        |              |            |           |               |            |
|----------|--------|------------|---------|--------------|------------|--------|--------------|------------|-----------|---------------|------------|
| EMIMSCN  |        |            | DMIMMPh |              |            | BMIMCl |              |            | EtOHMIMCl |               |            |
| $X_2$    | $T_2$  | $\gamma_2$ | $X_2$   | $T_2$        | $\gamma_2$ | $X_2$  | $T_2$        | $\gamma_2$ | $X_2$     | $T_2^{SLE/K}$ | $\gamma_2$ |
| 0.05     | 281.15 | 1.00       | 0.05    | 284.95       | 1.32       | 0.05   | 343.15       | 8.30       | 0.10      | 355.05        | 5.13       |
| 0.10     | 288.55 | 1.00       | 0.10    | 296.65       | 0.87       | 0.10   | 345.25       | 5.33       | 0.15      | 356.25        | 4.29       |
| 0.15     | 293.75 | 1.00       | 0.15    | 302.65       | 0.75       | 0.20   | 348.15       | 2.98       | 0.20      | 357.95        | 3.47       |
| 0.20     | 300.15 | 1.00       | 0.20    | 307.55       | 0.69       | 0.25   | 350.45       | 2.34       | 0.25      | 358.65        | 3.14       |
| 0.25     | 311.25 | 1.00       | 0.25    | 310.15       | 0.68       | 0.30   | 351.85       | 1.97       | 0.30      | 360.15        | 2.67       |
| 0.30     | 322.45 | 1.00       | 0.30    | 313.45       | 0.67       | 0.35   | 354.75       | 1.66       | 0.45      | 365.15        | 2.12       |
| 0.40     | 332.85 | 1.00       | 0.40    | 323.85       | 0.64       | 0.40   | 356.15       | 1.48       | 0.50      | 366.55        | 1.69       |
| 0.45     | 358.15 | 1.00       | 0.50    | 336.75       | 0.63       | 0.45   | 357.95       | 1.34       | 0.55      | 367.85        | 1.52       |
|          |        |            | 0.60    | 344.15       | 0.69       | 0.50   | 359.25       | 1.25       | 0.6       | 369.15        | 1.38       |
| Sucrose  |        |            |         |              |            |        |              |            |           |               |            |
| EMIMSCN  |        |            | DMIMMPh |              |            | BMIMCl |              |            | EtOHMIMCl |               |            |
| $X_2$    | $T_2$  | $\gamma_2$ | $X_2$   | $T_2$        | $\gamma_2$ | $X_2$  | $T_2$        | $\gamma_2$ | $X_2$     | $T_2^{SLE/K}$ | $\gamma_2$ |
| 0.025    | 284.25 | 0.039      | 0.05    | 286.15       | 0.017      | 0.05   | 343.95       | 0.442      | 0.05      | 356.15        | 0.775      |
| 0.05     | 301.15 | 0.061      | 0.10    | 295.65       | 0.019      | 0.10   | 347.95       | 0.241      | 0.10      | 357.65        | 0.433      |
| 0.08     | 318.85 | 0.094      | 0.15    | 307.8        | 0.023      | 0.15   | 351.45       | 0.182      | 0.15      | 359.95        | 0.297      |
| 0.10     | 330.9  | 0.123      | 0.20    | 316.05       | 0.029      | 0.20   | 354.15       | 0.169      | 0.20      | 363.35        | 0.240      |
| 0.15     | 348.15 | 0.180      | 0.25    | 329.4        | 0.036      | 0.22   | 356.82       | 0.162      | 0.25      | 366.20        | 0.226      |
| 0.20     | 362.25 | 0.241      | 0.30    | 343.35       | 0.046      | 0.25   | 359.7        | 0.163      | 0.28      | 369.15        | 0.224      |
| 0.25     | 371.25 | 0.292      | 0.40    | 359.85       | 0.084      | 0.30   | 367.05       | 0.168      | 0.30      | 372.75        | 0.222      |
| 0.30     | 383.15 | 0.362      | 0.50    | 376.45       | 0.146      | 0.35   | 373.45       | 0.188      | 0.35      | 377.05        | 0.243      |
|          |        |            |         |              |            | 0.40   | 380.3        | 0.219      | 0.40      | 384.15        | 0.271      |
| Lactose  |        |            |         |              |            |        |              |            |           |               |            |
| EMIMSCN  |        |            | DMIMMPh |              |            | BMIMCl |              |            | EtOHMIMCl |               |            |
| $X_2$    | $T_2$  | $\gamma_2$ | $X_2$   | $T_2^{SLE/}$ | $\gamma_2$ | $X_2$  | $T_2^{SLE/}$ | $\gamma_2$ | $X_2$     | $T_2^{SLE/K}$ | $\gamma_2$ |
| 0.025    | 288.05 | 0.0002     | 0.05    | 290.55       | 0.004      | 0.025  | 344.15       | 0.143      | 0.025     | 355.75        | 0.063      |
| 0.05     | 309.65 | 0.0007     | 0.10    | 299.25       | 0.003      | 0.05   | 351.95       | 0.088      | 0.05      | 360.5         | 0.042      |
| 0.08     | 326.75 | 0.0022     | 0.16    | 308.95       | 0.003      | 0.10   | 359.05       | 0.067      | 0.10      | 366.35        | 0.032      |
| 0.10     | 339.6  | 0.0056     | 0.23    | 319.05       | 0.004      | 0.15   | 366.85       | 0.059      | 0.15      | 372.55        | 0.029      |
| 0.125    | 362.25 | 0.0159     | 0.30    | 333.15       | 0.005      | 0.20   | 371.35       | 0.056      | 0.20      | 378.65        | 0.031      |
| 0.155    | 373.25 | 0.0320     | 0.32    | 338.85       | 0.006      | 0.28   | 381.55       | 0.058      | 0.25      | 384.15        | 0.039      |
| 0.18     | 382.55 | 0.0512     | 0.35    | 344.45       | 0.008      |        |              |            |           |               |            |
|          |        |            | 0.393   | 356.25       | 0.011      |        |              |            |           |               |            |

Table S2: Kamlet-Taft parameters of some ionic liquids and organic compounds, where  $\alpha$  the hydrogen bond acidity,  $\beta$  is the hydrogen bond basicity and  $\pi^*$  is the dipolarity<sup>41-46</sup>.

| ILs and organic compounds           | $\alpha$ | $\beta$ | $\pi^*$ |
|-------------------------------------|----------|---------|---------|
| H <sub>2</sub> O                    | 1.17     | 0.47    | 1.09    |
| EtOH                                | 0.86     | 0.75    | 0.51    |
| MeOH                                | 0.98     | 0.66    | 0.60    |
| 1-propanol                          | 0.84     | 0.85    | 0.53    |
| 2-propanol                          | 0.76     | 0.93    | 0.48    |
| Acetonitrile                        | 0.19     | 0.40    | 0.66    |
| DMSO                                | 0        | 0.76    | 1       |
| BMPyTf <sub>2</sub> N               | 0.52     | 0.37    | 0.93    |
| BMIMPF <sub>4</sub>                 | 0.63     | 0.38    | 1.05    |
| BMIMC(CN) <sub>3</sub>              | 0.51     | 0.54    | 0.94    |
| BMIMN(CN) <sub>2</sub>              | 0.54     | 0.71    | 1.05    |
| EMIM N(CN) <sub>2</sub>             | 0.54     | 0.64    | 1.07    |
| HOMMIMN(CN) <sub>2</sub>            | 0.80     | 0.51    | 1.11    |
| BMIMHSO <sub>4</sub>                | -        | 0.67    | 1.09    |
| EMIMMSO <sub>4</sub>                | 0.57     | 0.61    | 1.09    |
| BMIMMSO <sub>3</sub>                | 0.44     | 0.77    | 1.02    |
| EMIMEtSO <sub>4</sub>               | n.a.     | 0.710   | n.a.    |
| BMIMCF <sub>3</sub> SO <sub>3</sub> | 0.50     | 0.57    | 0.90    |
| BMIMSCN                             | -        | 0.71    | 1.06    |
| EtOHMIMCl                           | 0.73     | 0.68    | 1.16    |
| BMIMCl                              | 0.48     | 0.94    | 1.03    |
|                                     | 0.47     | 0.87    | 1.10    |
| EMIMMPh                             | 0.51     | 1       | 1.06    |

Table S3: Solubility of carbohydrates in ILs in the literature<sup>29-31, 37, 47</sup>

| Sucrose                                          |        |                                     |        |                                     |        |
|--------------------------------------------------|--------|-------------------------------------|--------|-------------------------------------|--------|
| BMIMSCN                                          |        | BMIMHSO <sub>4</sub>                |        | BMIMC(CN) <sub>3</sub>              |        |
| S. (Wt%)                                         | T/K    | S. (Wt%)                            | T/K    | S. (Wt%)                            | T/K    |
| 2                                                | 315.2  | 2.0                                 | 358.74 | 1.0                                 | 381.2  |
| 5.2                                              | 325.01 | 5.0                                 | 363.05 | 2.1                                 | 391.38 |
| 10.0                                             | 339.78 | 10.1                                | 368.27 | 5.3                                 | 406.64 |
| 20.0                                             | 369.2  | 15.1                                | 372.45 | BMIMCF <sub>3</sub> SO <sub>3</sub> |        |
| 30.0                                             | 399.92 | 25.9                                | 380.13 | S. (g/l)                            | T/K    |
| 35.3                                             | 411.67 | 35.0                                | 388.5  | 2.0                                 | 298.15 |
| BMIMBF <sub>4</sub>                              |        | EMIMBF <sub>4</sub>                 |        | 5.3                                 | 333.15 |
| S. (g/l)                                         | T/K    | S. (g/l)                            | T/K    | EMIMCH <sub>3</sub> SO <sub>3</sub> |        |
| 0.5                                              | 298.15 | 0.6                                 | 298.15 | S. (g/l)                            | T/K    |
| 0.6                                              | 333.15 | 0.6                                 | 333.15 | 12.4                                | 298.15 |
|                                                  |        |                                     |        | 80                                  | 348.15 |
| Fructose                                         |        |                                     |        |                                     |        |
| EMIMEtSO <sub>4</sub>                            |        | BMIMCF <sub>3</sub> SO <sub>3</sub> |        | EMIMCF <sub>3</sub> SO <sub>3</sub> |        |
| S. (Wt%)                                         | T/K    | S. (g/l)                            | T/K    | S. (g/l)                            | T/K    |
| 25.7                                             | 288.2  | 27.0                                | 298.15 | 32.8                                | 298.15 |
| 29                                               | 298.2  | 87.5                                | 333.15 | 123.9                               | 333.15 |
| 37.4                                             | 318.4  |                                     |        |                                     |        |
| Lactose                                          |        |                                     |        |                                     |        |
| Bt <sub>14</sub> CH <sub>3</sub> SO <sub>3</sub> |        | Bt <sub>14</sub> N(CN) <sub>2</sub> |        | MOEOEMIMCl                          |        |
| S. (Wt%)                                         | T/K    | S. (Wt%)                            | T/K    | S. (Wt%)                            | T/K    |
| 8                                                | 348.15 | 8                                   | 348.15 | 10.69                               | 308.15 |



Table S4: Van der waals volume and surface parameters for UNIQUAC model.

| ILs/ Sugar | $r_i$   | $q_i$  |
|------------|---------|--------|
| BMIMCl     | 4.709   | 3.967  |
| EtOHMIMCl  | 4.487   | 3.790  |
| DMIMPh     | 6.017   | 4.756  |
| EMIMSCN    | 4.437   | 3.75   |
| Fructose   | 5.8     | 4.92   |
| Sucrose    | 14.5496 | 13.764 |
| Lactose    | 12.5265 | 12.228 |

Table S5: Correlation of the solid-liquid equilibria data by means of the NRTL and UNIQUAC equations,  $\sigma_T$  the temperature deviation

| Fructose     |                                         |                                         |                                                           |                                                           |            |
|--------------|-----------------------------------------|-----------------------------------------|-----------------------------------------------------------|-----------------------------------------------------------|------------|
| Solvent      | NRTL parameters                         |                                         |                                                           |                                                           | rmsd       |
| Ionic liquid | $a_{12}/(\text{J}\cdot\text{mol}^{-1})$ | $a_{21}/(\text{J}\cdot\text{mol}^{-1})$ | $b_{12}/(\text{J}\cdot\text{mol}^{-1}\cdot\text{K}^{-1})$ | $b_{21}/(\text{J}\cdot\text{mol}^{-1}\cdot\text{K}^{-1})$ | $\sigma_T$ |
| BMIMCl       | 89998.38                                | 9998.16                                 | -241.59                                                   | -1226.26                                                  | 1.65       |
| DMIMMPh      | 28596.29                                | 524.41                                  | -96.48                                                    | -3.09                                                     | 2.54       |
| EMIMSCN      | 100001.28                               | 5002.78                                 | 151.19                                                    | 856.42                                                    | 6.08       |
| EtOHMIMCl    | 147201.97                               | 90547.33                                | -415.29                                                   | -206.45                                                   | 1.17       |
| Solvent      | UNIQUAC parameters                      |                                         |                                                           |                                                           | rmsd       |
| Ionic liquid | $a_{12}/(\text{J}\cdot\text{mol}^{-1})$ | $a_{21}/(\text{J}\cdot\text{mol}^{-1})$ | $b_{12}/(\text{J}\cdot\text{mol}^{-1}\cdot\text{K}^{-1})$ | $b_{21}/(\text{J}\cdot\text{mol}^{-1}\cdot\text{K}^{-1})$ | $\sigma_T$ |
| BMIMCl       | -4296.64                                | 13303.32                                | 17.67                                                     | -39.54                                                    | 2.64       |
| DMIMMPh      | -4296.65                                | 13303.31                                | 13.67                                                     | -43.35                                                    | 1.43       |
| EMIMSCN      | 4009.51                                 | 10979.11                                | -21.81                                                    | 111.23                                                    | 5.39       |
| EtOHMIMCl    | 9.98                                    | 9.97                                    | 3.17                                                      | 0.83                                                      | 3.40       |
| Sucrose      |                                         |                                         |                                                           |                                                           |            |
| Solvent      | NRTL parameters                         |                                         |                                                           |                                                           | rmsd       |
| Ionic liquid | $a_{12}/(\text{J}\cdot\text{mol}^{-1})$ | $a_{21}/(\text{J}\cdot\text{mol}^{-1})$ | $b_{12}/(\text{J}\cdot\text{mol}^{-1}\cdot\text{K}^{-1})$ | $b_{21}/(\text{J}\cdot\text{mol}^{-1}\cdot\text{K}^{-1})$ | $\sigma_T$ |
| BMIMCl       | 93902.37                                | 10365.21                                | -215.09                                                   | -59.64                                                    | 0.65       |
| DMIMMPh      | -1993.92                                | 5922.61                                 | -9.37                                                     | -34.90                                                    | 2.84       |
| EMIMSCN      | -18249.49                               | 16869.27                                | 36.39                                                     | 4925.43                                                   | 2.34       |
| EtOHMIMCl    | 93902.41                                | 10364.49                                | -202.85                                                   | -57.62                                                    | 0.62       |
| Solvent      | UNIQUAC parameters                      |                                         |                                                           |                                                           | rmsd       |
| Ionic liquid | $a_{12}/(\text{J}\cdot\text{mol}^{-1})$ | $a_{21}/(\text{J}\cdot\text{mol}^{-1})$ | $b_{12}/(\text{J}\cdot\text{mol}^{-1}\cdot\text{K}^{-1})$ | $b_{21}/(\text{J}\cdot\text{mol}^{-1}\cdot\text{K}^{-1})$ | $\sigma_T$ |
| BMIMCl       | -19791.44                               | 17061.38                                | 66.95                                                     | -55.81                                                    | 0.89       |
| DMIMMPh      | 912.18                                  | 322.39                                  | -10.56                                                    | 5.07                                                      | 2.76       |
| EMIMSCN      | 0.86                                    | 0.82                                    | 4.76                                                      | -4.79                                                     | 2.25       |
| EtOHMIMCl    | 18108.31                                | 11535.19                                | -41.56                                                    | -38.23                                                    | 0.99       |
| Lactose      |                                         |                                         |                                                           |                                                           |            |
| Solvent      | NRTL parameters                         |                                         |                                                           |                                                           | rmsd       |
| Ionic liquid | $a_{12}/(\text{J}\cdot\text{mol}^{-1})$ | $a_{21}/(\text{J}\cdot\text{mol}^{-1})$ | $b_{12}/(\text{J}\cdot\text{mol}^{-1}\cdot\text{K}^{-1})$ | $b_{21}/(\text{J}\cdot\text{mol}^{-1}\cdot\text{K}^{-1})$ | $\sigma_T$ |
| BMIMCl       | 16672.21                                | 30671.24                                | -44.28                                                    | -103.84                                                   | 0.60       |
| DMIMMPh      | 18055.20                                | 26076.84                                | -59.27                                                    | -117.40                                                   | 0.58       |
| EMIMSCN      | -58208.87                               | -32291.41                               | 118.89                                                    | 212.59                                                    | 3.59       |
| EtOHMIMCl    | 21787.11                                | 21399.52                                | -10.25                                                    | -93.37                                                    | 0.48       |
| Solvent      | UNIQUAC parameters                      |                                         |                                                           |                                                           | rmsd       |
| Ionic liquid | $a_{12}/(\text{J}\cdot\text{mol}^{-1})$ | $a_{21}/(\text{J}\cdot\text{mol}^{-1})$ | $b_{12}/(\text{J}\cdot\text{mol}^{-1}\cdot\text{K}^{-1})$ | $b_{21}/(\text{J}\cdot\text{mol}^{-1}\cdot\text{K}^{-1})$ | $\sigma_T$ |
| BMIMCl       | -1550.39                                | 14159.91                                | -0.63                                                     | -36.09                                                    | 0.54       |
| DMIMMPh      | -3377.67                                | 12309.61                                | 4.55                                                      | -39.55                                                    | 0.61       |
| EMIMSCN      | 0.00                                    | 0.00                                    | 6.71                                                      | -6.71                                                     | 3.78       |
| EtOHMIMCl    | -19451.16                               | 30000.08                                | 52.87                                                     | -83.45                                                    | 0.92       |

Table S6: Solubility of sugars in water and ethanol

| Solvent | T /K   | Solubility (g/l) |          |         |         |
|---------|--------|------------------|----------|---------|---------|
|         |        | Glucose          | Fructose | Sucrose | Lactose |
| Water   | 293.15 | 900              | 3750     | 2000    |         |
|         | 298.15 | 1100             |          | 2074.1  | 233.12  |
|         | 313.15 |                  |          | 2345    | 235.97  |
|         | 333.15 |                  |          | 2885.7  | 592.73  |
| Ethanol | 293.15 | 1.29             | 11.597   | 0.414   | 0.02    |
|         | 298.15 | 1.31             | 18.20    | 0.599   | 0.11    |
|         | 313.15 |                  | 23.897   | 0.761   | 0.19    |
|         | 333.15 |                  | 30.547   | 0.987   | 0.27    |
